# Supplementary material for: Adherence to Data-Driven Dietary Patterns and Lung Cancer Risk: A Systematic Review and Dose–Response Meta-Analysis
Source: MDPI journal article supplement (doi:10.3390/nu15204406), 2023-10-17
Supplement: s1 [file s1]

# Supplementary Materials: Adherence to Data-Driven Dietary Patterns and Lung Cancer Risk: A Systematic Review and Dose–Response Meta-Analysis

**Table S1.** PICO criteria for inclusion of studies

| Parameter  | Criterion                                                                                                    |
|------------|--------------------------------------------------------------------------------------------------------------|
| Patients   | Healthy adult participants or adult patients with lung cancer                                                |
| Exposure   | Dietary patterns identified by “a posteriori” methods                                                        |
| Comparison | Highest “a posteriori” dietary patterns adherence <i>vs</i> lowest “a posteriori” dietary patterns adherence |
| Outcome    | “lung cancer” OR “respiratory cancer” OR “pulmonary cancer”                                                  |

**Table S2.** Methodological quality of case-control studies included in the meta-analysis \*.

| First Author,<br>Publication Year<br>[Reference] | Adequate<br>Definition of<br>Cases | Representativeness<br>of Cases | Selection<br>of Control<br>Subjects | Definition<br>of Control<br>Subjects | Control for<br>Important Factor<br>or Additional<br>Factor † | Exposure<br>Assessment | Same Method of<br>Ascertainment<br>for All Subjects | Non<br>Response<br>Rate ‡ | Total<br>Quality<br>Scores |
|--------------------------------------------------|------------------------------------|--------------------------------|-------------------------------------|--------------------------------------|--------------------------------------------------------------|------------------------|-----------------------------------------------------|---------------------------|----------------------------|
| Hawrysz, 2020 [22]                               | ★                                  | ★                              | ★                                   | ★                                    | ★                                                            | ★                      | ★                                                   | ★                         | 8                          |
| He, 2018 [23]                                    | ---                                | ★                              | ★                                   | ---                                  | ★                                                            | ★                      | ★                                                   | ★                         | 6                          |
| Tu, 2016 [24]                                    | ★                                  | ★                              | ★                                   | ★                                    | ★★                                                           | ★                      | ★                                                   | ★                         | 9                          |
| Gorlova, 2011 [26]                               | ★                                  | ★                              | ★                                   | ★                                    | ★                                                            | ★                      | ★                                                   | ★                         | 8                          |
| De Stefani, 2011 [27]                            | ★                                  | ★                              | ★                                   | ★                                    | ★                                                            | ★                      | ★                                                   | ★                         | 8                          |
| De Stefani, 2009 [28]                            | ★                                  | ★                              | ★                                   | ★                                    | ★★                                                           | ★                      | ★                                                   | ---                       | 8                          |
| De Stefani, 2008 [29]                            | ★                                  | ★                              | ★                                   | ★                                    | ★                                                            | ★                      | ★                                                   | ★                         | 8                          |
| Tsai, 2003 [31]                                  | ★                                  | ★                              | ★                                   | ★                                    | ★                                                            | ★                      | ★                                                   | ---                       | 7                          |

\* A study could be awarded a maximum of one star for each item except for the item Control for important factor or additional factor. † A maximum of 2 stars could be awarded for this item. Studies that controlled for age received one star, whereas studies that controlled for other important confounders (smoking and total energy intake/BMI) received an additional star. ‡ One star was assigned if there was no significant difference in the response rate between control subjects and cases by using the chi-square test ( $p < 0.05$ ).

**Table S3.** Methodological quality of cohort studies included in the meta-analysis \*.

| First Author,<br>Publication Year<br>[Reference] | Representativeness<br>of the Exposed<br>Cohort | Selection of<br>the Unexposed<br>Cohort | Ascertainment<br>of Exposure | Outcome of<br>Interest Not<br>Present at Start<br>of Study | Control for<br>Important Factor<br>or Additional<br>Factor † | Assessment<br>of Outcome | Follow-Up<br>Long Enough<br>for Outcomes<br>to Occur ‡ | Adequacy of<br>Follow-Up of<br>Cohorts § | Total<br>Quality<br>Scores |
|--------------------------------------------------|------------------------------------------------|-----------------------------------------|------------------------------|------------------------------------------------------------|--------------------------------------------------------------|--------------------------|--------------------------------------------------------|------------------------------------------|----------------------------|
| Willemssen, 2021 [20]                            | ★                                              | ★                                       | ★                            | ★                                                          | ★★                                                           | ★                        | ★                                                      | ★                                        | 9                          |
| Wie, 2021 [21]                                   | ★                                              | ★                                       | ★                            | ★                                                          | ★★                                                           | ★                        | ★                                                      | ★                                        | 9                          |
| Gnagnarella, 2013 [25]                           | ---                                            | ★                                       | ★                            | ★                                                          | ★                                                            | ---                      | ★                                                      | ★                                        | 6                          |
| Balder, 2005 [30]                                | ★                                              | ★                                       | ★                            | ---                                                        | ★                                                            | ★                        | ★                                                      | ★                                        | 7                          |

\* A study could be awarded a maximum of one star for each item except for the item Control for important factor or additional factor. † A maximum of 2 stars could be awarded for this item. Studies that controlled for age received one star, whereas studies that controlled for other important confounders (smoking and total energy intake/BMI) received an additional star. ‡ A cohort study with a follow-up time > 6 years was assigned one star. § A cohort study with a follow-up rate > 75% was assigned one star.

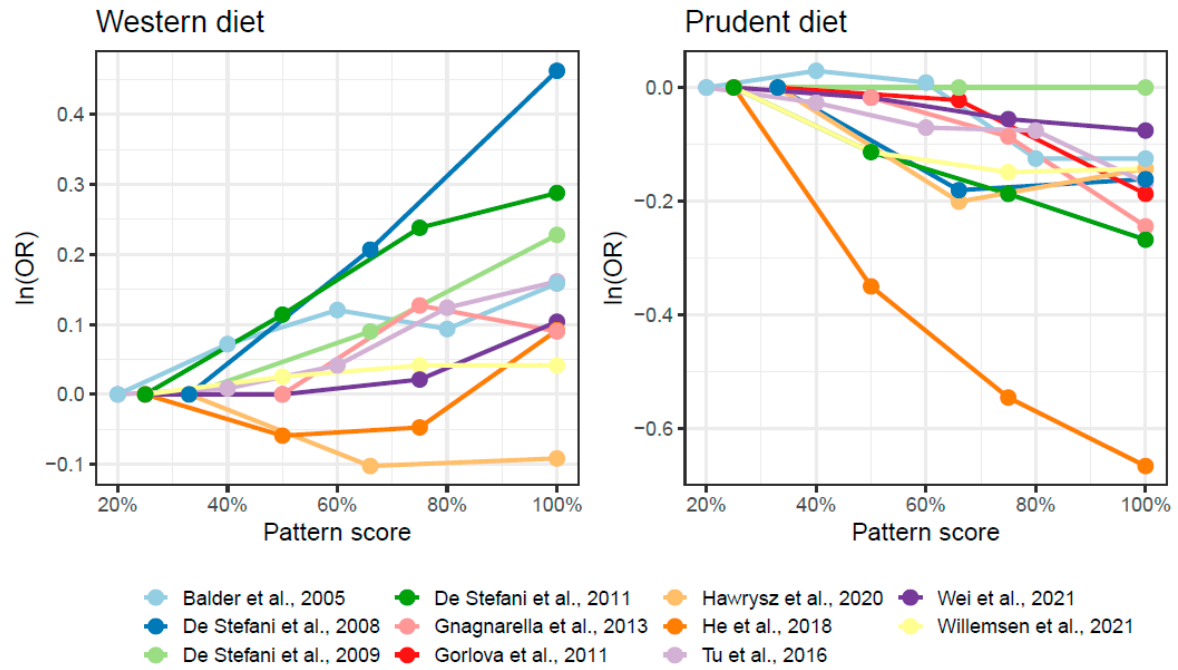

**Figure S1.** Dose-response plots of the relation between the intake of the “Western/meat” dietary pattern (left) and “Healthy/prudent” dietary pattern (right) and lung cancer risk in the different studies included in the meta-analysis [20-31].
